# Supplementary material for: Characteristic of molecular subtypes in lung adenocarcinoma based on m6A RNA methylation modification and immune microenvironment
Source: Springer Nature journal article supplement (doi:10.1186/s12885-021-08655-1), 2021-08-20

Volcano Plot

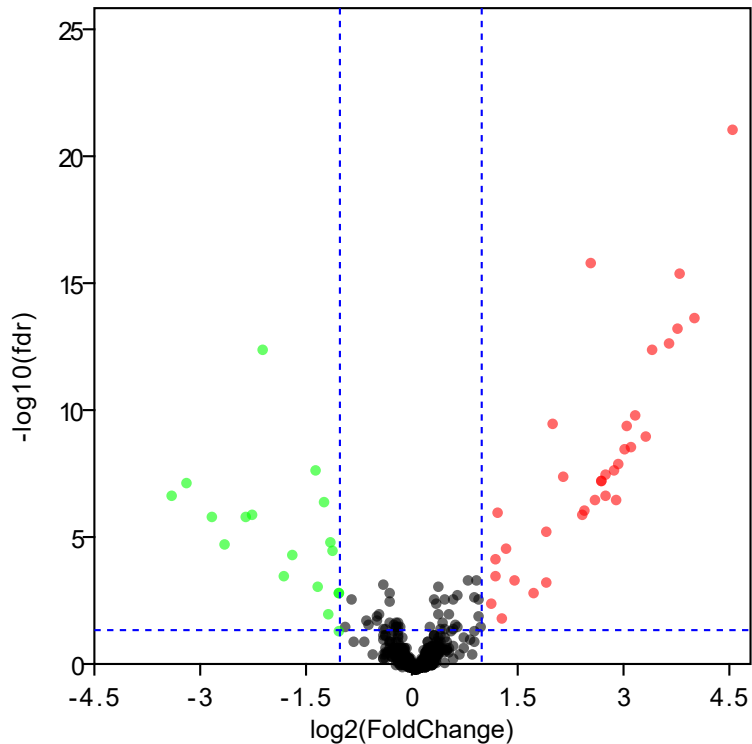

Supplement: MOESM2 [file 19586536]
