# Supplementary material for: Characteristic of molecular subtypes in lung adenocarcinoma based on m6A RNA methylation modification and immune microenvironment
Source: Springer Nature journal article supplement (doi:10.1186/s12885-021-08655-1), 2021-08-20
Supplement: MOESM3 [file 19586536]

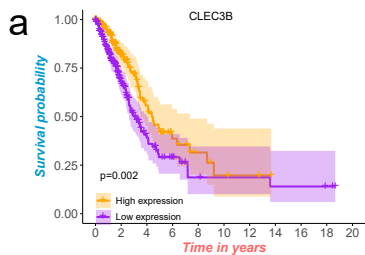

Number at risk

|                 |     |    |    |    |   |    |    |    |    |    |    |
|-----------------|-----|----|----|----|---|----|----|----|----|----|----|
| High expression | 201 | 74 | 29 | 12 | 6 | 3  | 2  | 0  | 0  | 0  | 0  |
| Low expression  | 293 | 85 | 25 | 12 | 5 | 4  | 4  | 3  | 3  | 2  | 0  |
|                 | 0   | 2  | 4  | 6  | 8 | 10 | 12 | 14 | 16 | 18 | 20 |

Time in years

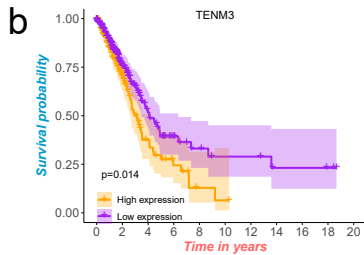

Number at risk

|                 |     |     |    |    |   |    |    |    |    |    |    |
|-----------------|-----|-----|----|----|---|----|----|----|----|----|----|
| High expression | 193 | 57  | 19 | 8  | 2 | 1  | 0  | 0  | 0  | 0  | 0  |
| Low expression  | 301 | 102 | 35 | 16 | 9 | 6  | 6  | 3  | 3  | 2  | 0  |
|                 | 0   | 2   | 4  | 6  | 8 | 10 | 12 | 14 | 16 | 18 | 20 |

Time in years

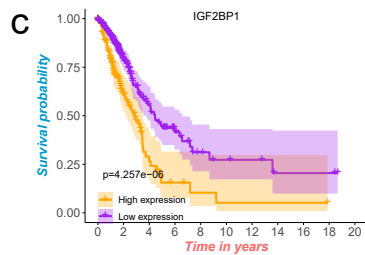

Number at risk

|                 |     |     |    |    |   |    |    |    |    |    |    |
|-----------------|-----|-----|----|----|---|----|----|----|----|----|----|
| High expression | 149 | 43  | 11 | 4  | 2 | 1  | 1  | 1  | 1  | 0  | 0  |
| Low expression  | 345 | 116 | 43 | 20 | 9 | 6  | 5  | 2  | 2  | 2  | 0  |
|                 | 0   | 2   | 4  | 6  | 8 | 10 | 12 | 14 | 16 | 18 | 20 |

Time in years

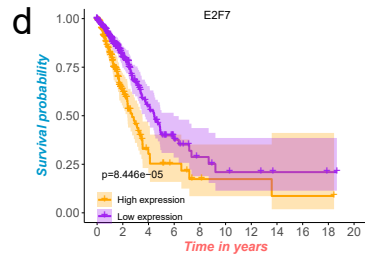

Number at risk

|                 |     |     |    |    |   |    |    |    |    |    |    |
|-----------------|-----|-----|----|----|---|----|----|----|----|----|----|
| High expression | 186 | 50  | 12 | 7  | 3 | 2  | 2  | 1  | 1  | 1  | 0  |
| Low expression  | 308 | 109 | 42 | 17 | 8 | 5  | 4  | 2  | 2  | 1  | 0  |
|                 | 0   | 2   | 4  | 6  | 8 | 10 | 12 | 14 | 16 | 18 | 20 |

Time in years

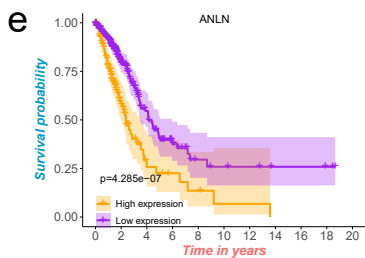

Number at risk

|                 |     |     |    |    |   |    |    |    |    |    |    |
|-----------------|-----|-----|----|----|---|----|----|----|----|----|----|
| High expression | 150 | 39  | 8  | 5  | 3 | 1  | 1  | 0  | 0  | 0  | 0  |
| Low expression  | 344 | 120 | 46 | 19 | 8 | 6  | 5  | 3  | 3  | 2  | 0  |
|                 | 0   | 2   | 4  | 6  | 8 | 10 | 12 | 14 | 16 | 18 | 20 |

Time in years

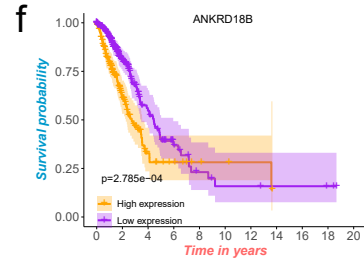

Number at risk

|                 |     |     |    |    |   |    |    |    |    |    |    |
|-----------------|-----|-----|----|----|---|----|----|----|----|----|----|
| High expression | 182 | 56  | 14 | 8  | 4 | 3  | 2  | 0  | 0  | 0  | 0  |
| Low expression  | 312 | 103 | 40 | 16 | 7 | 4  | 4  | 3  | 3  | 2  | 0  |
|                 | 0   | 2   | 4  | 6  | 8 | 10 | 12 | 14 | 16 | 18 | 20 |

Time in years

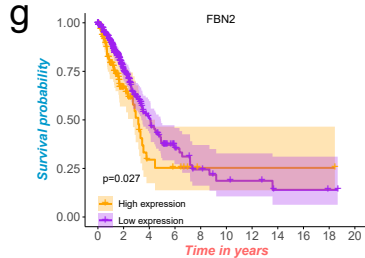

Number at risk

|                 |     |     |    |    |    |    |    |    |    |    |    |
|-----------------|-----|-----|----|----|----|----|----|----|----|----|----|
| High expression | 107 | 28  | 7  | 5  | 1  | 1  | 1  | 1  | 1  | 1  | 0  |
| Low expression  | 387 | 131 | 47 | 19 | 10 | 6  | 5  | 2  | 2  | 1  | 0  |
|                 | 0   | 2   | 4  | 6  | 8  | 10 | 12 | 14 | 16 | 18 | 20 |

Time in years
